# Supplementary material for: Highly efficient electrochemiluminescence based on 4-amino-1,2,4-triazole Schiff base two-dimensional Zn/Cd coordination polymers
Source: Royal Society of Chemistry journal article supplement (doi:10.1039/c6dt04059d), 2016-11-28
Supplement: c6dt04059d1.pdf [file c6dt04059d1.pdf]

# Highly efficient electrochemiluminescence based on 4-amino-1,2,4-Triazole schiff base two-dimensional Zn/Cd coordination polymers

Shu-Hua Zhang,\* Ji-Ming Wang, Hai-Yang Zhang, Yi-Peng Fan, Yu Xiao,\*

Guangxi Key Laboratory of Electrochemical and Magnetochemical Functional Materials,  
Collaborative Innovation Center for Exploration of Hidden Nonferrous Metal Deposits and  
Development of New Materials in Guangxi (College of Chemistry and Bioengineering), Guilin  
University of Technology, Guilin 541004, People's Republic of China

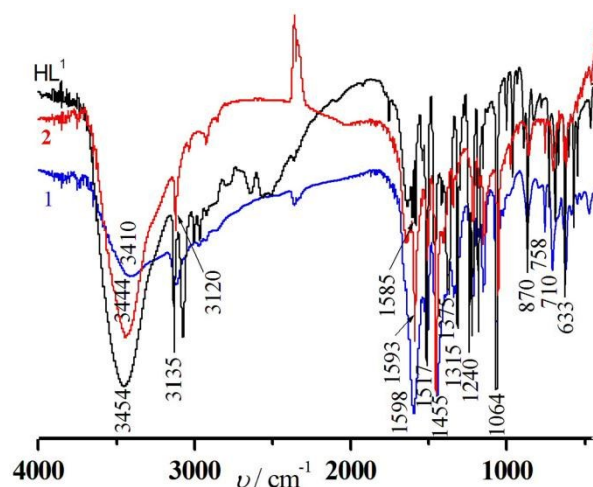

Fig. S1. IR of HL<sup>1</sup>, 1 and 2.

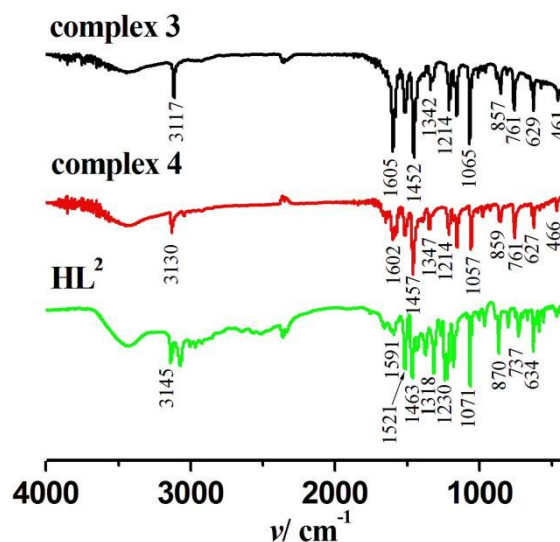

Fig. S2. IR of HL<sup>2</sup>, 3 and 4.

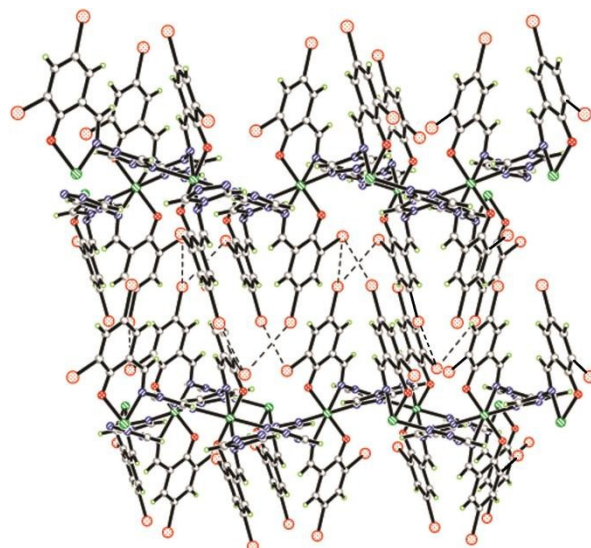

Fig. S3. 3D structure of **1**.

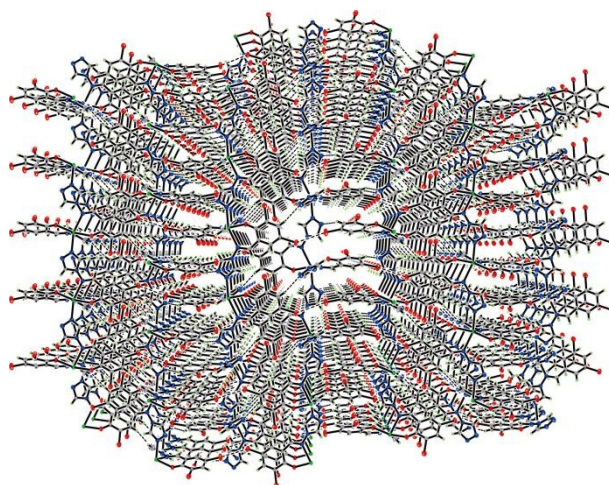

Fig. S4. 3D structure of **2**.

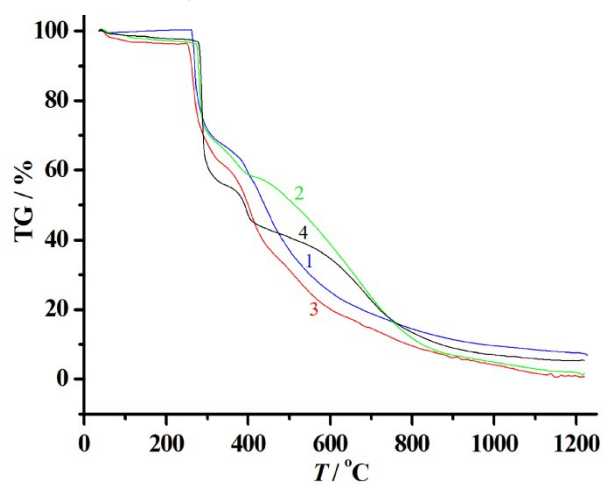

Fig. S5 Thermogravimetric analysis of compounds **1-4**.

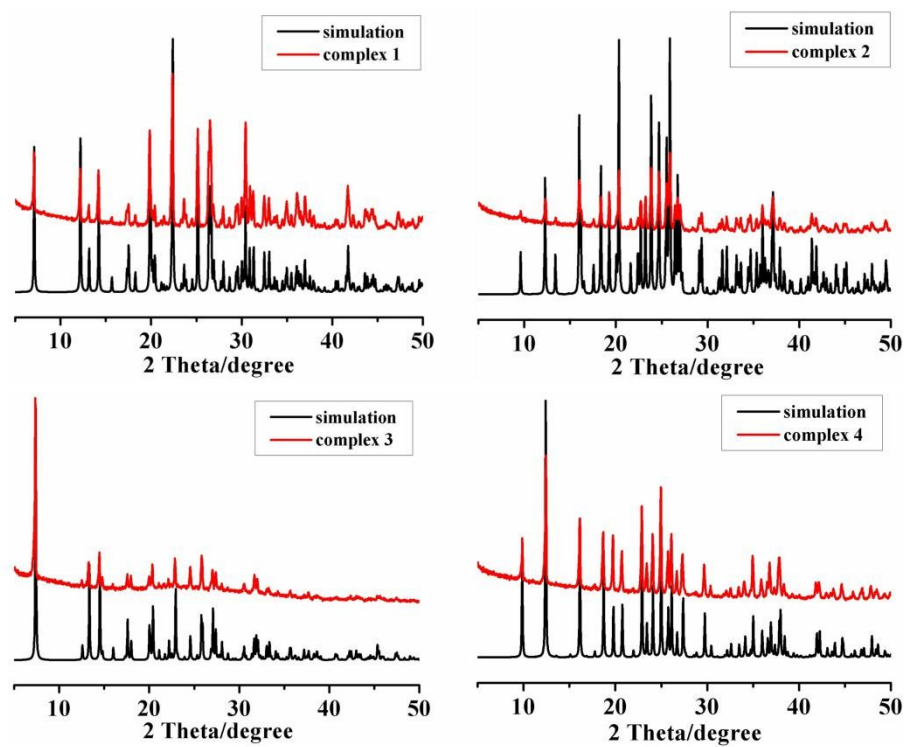

Fig. S6 PXRD of 1-4.

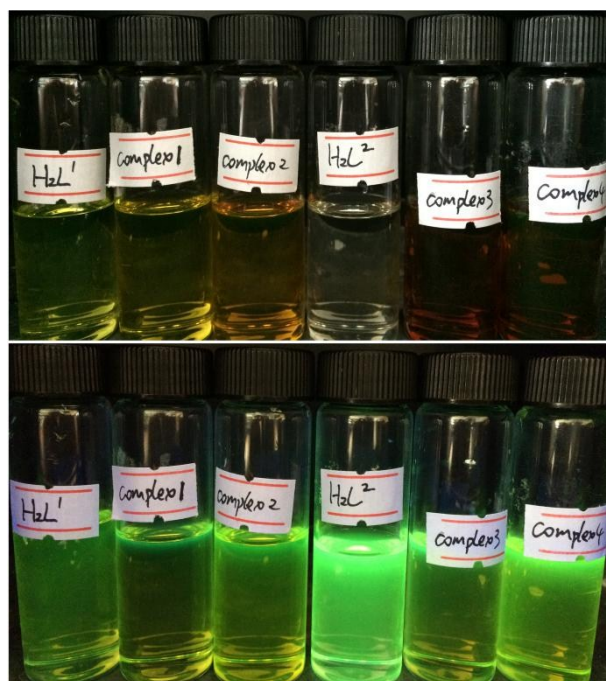

Fig. S7. Photos of 1-4, HL<sup>1</sup> and HL<sup>2</sup> with the concentration at  $10^{-4}$  mol/L for 1-4, HL<sup>1</sup> and HL<sup>2</sup>: visible light (Upper), UV-light (down).

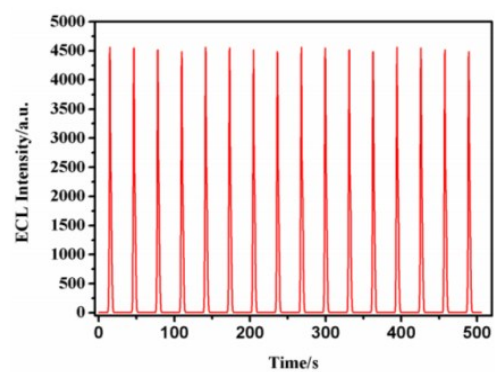

Fig. S8 Electrochemical luminescence of  $\text{Ru}(\text{bpy})_3^{3+}$ [27].
